# Supplementary material
Source: Springer Nature journal article supplement (https://www.springermedizin.de/resource/supplementary/12933_2009_226_MOESM1_ESM.pdf/9540022)
Supplement: MOESM1 [file 9540022]

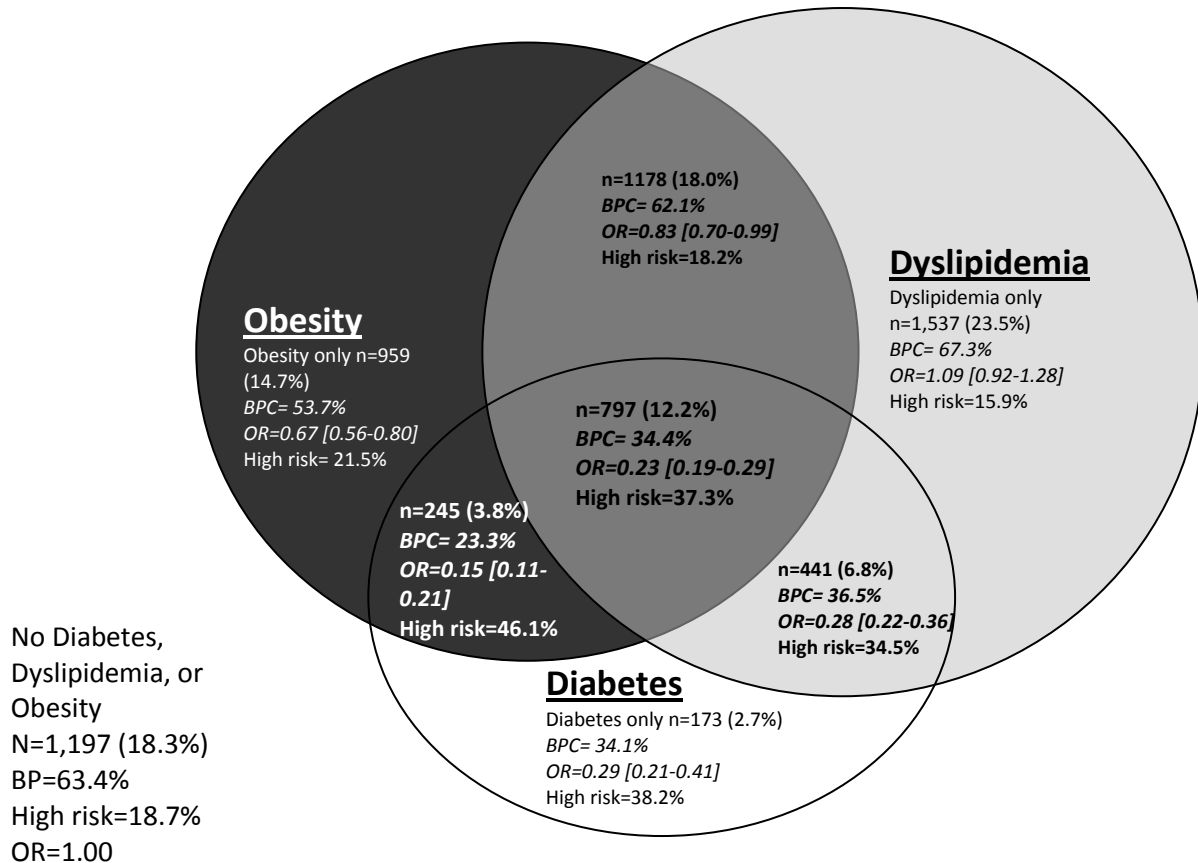

\* Percentage of all hypertensive patients in the cohort (n=6,527) with the specific CMRFC indicated is given in parentheses; percentage of patients within each CMRFC with controlled BP is indicated by 'BPC' in italics. BP control is defined as <140/90 for non-diabetic and <130/80 for diabetic patients; 'high risk' is defined as either SBP  $\geq 10$  mmHg from goal or DBP  $\geq 5$  mmHg from goal (based on diabetic status). OR is odds ratio for BP control and associated 95% confidence interval included in square brackets; age, gender, race/ethnicity, presence of kidney disease, number of antihypertensive medications, and total number of chronic medications were also included in the regression model.
